# Supplementary material for: Genome-Wide Association Study and Transcriptome of Japanese Patients with Developmental Dysplasia of the Hip Demonstrates an Association with the Ferroptosis Signaling Pathway
Source: MDPI journal article supplement (doi:10.3390/ijms24055019), 2023-03-06
Supplement: s1 [file s1]

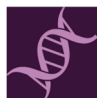

## Supplementary Material

1

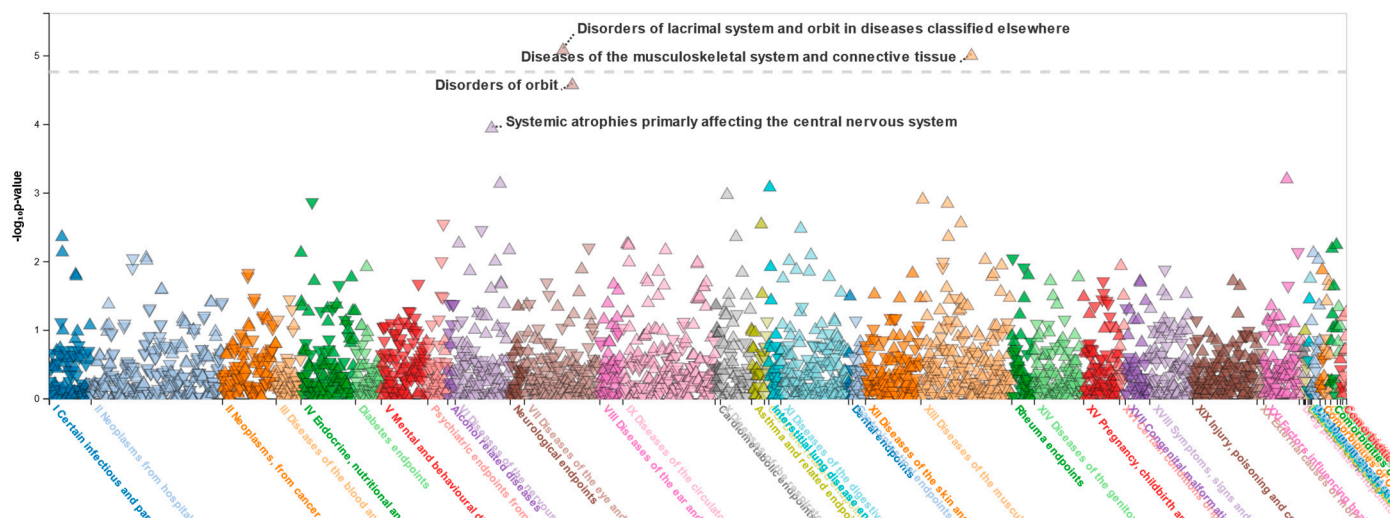

Figure S1. PheWAS of the Finnish population in the data freeze 5 to rs17699467.

2

3

4

5

6

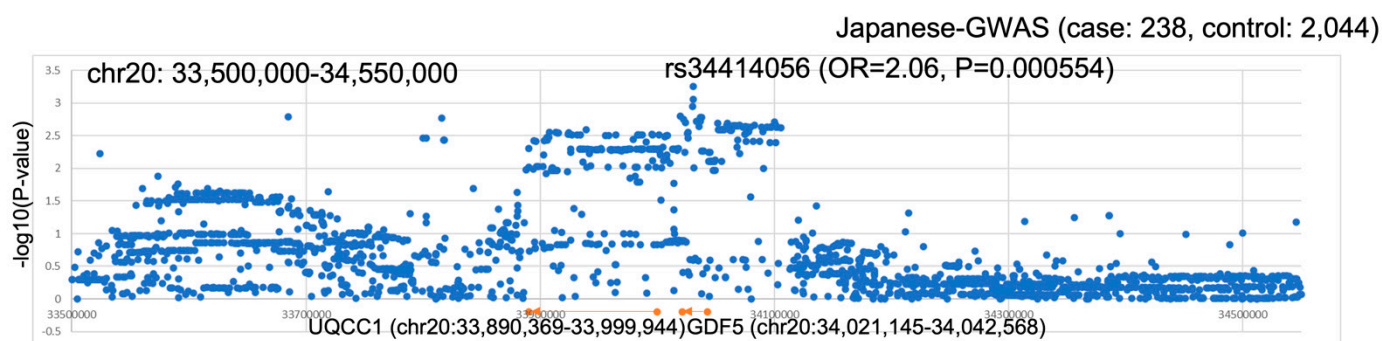

Figure S2. SNPs around GDF5-UQCC1 (Japanese population GWAS).

7

8

9

**Table S1.** Concordance rate calculation to the whole genome sequencing data

|            | matched | unmatched | concordance rate |
|------------|---------|-----------|------------------|
| rs11802858 | 190     | 0         | 1                |
| rs2554380  | 189     | 1         | 0.99             |
| rs79657649 | 190     | 0         | 1                |
| rs17699467 | 190     | 0         | 1                |

**Table S2.** List of the 42 genes assigned by FUMA from Japanese GWAS

| ensg            | entrez    | symbol        |
|-----------------|-----------|---------------|
| ENSG00000196482 | 2104      | ESRRG         |
| ENSG00000143954 | 130120    | REG3G         |
| ENSG00000172023 | 5968      | REG1B         |
| ENSG00000115386 | 5967      | REG1A         |
| ENSG00000118997 | 56171     | DNAH7         |
| ENSG00000231672 | 729582    | DIRC3         |
| ENSG00000079308 | 7145      | TNS1          |
| ENSG00000174839 | 201627    | DENND6A       |
| ENSG00000136068 | 2317      | FLNB          |
| ENSG00000145431 | 56034     | PDGFC         |
| ENSG00000174473 | 442117    | GALNTL6       |
| ENSG00000083857 | 2195      | FAT1          |
| ENSG00000242110 | 23600     | AMACR         |
| ENSG00000273294 | 100534612 | RP11-1084J3.4 |
| ENSG00000082196 | 114899    | C1QTNF3       |
| ENSG00000124721 | 1769      | DNAH8         |
| ENSG00000112164 | 2740      | GLP1R         |
| ENSG00000157680 | 9162      | DGKI          |
| ENSG00000079459 | 2222      | FDFT1         |
| ENSG00000164733 | 1508      | CTSB          |
| ENSG00000133731 | 3612      | IMPA1         |
| ENSG00000253598 | 347051    | SLC10A5       |
| ENSG00000155087 | 4956      | ODF1          |
| ENSG00000197790 | 119772    | OR52M1        |
| ENSG00000171533 | 4135      | MAP6          |
| ENSG00000183715 | 4978      | OPCML         |
| ENSG00000127311 | 92797     | HELB          |
| ENSG00000155974 | 23426     | GRIP1         |
| ENSG00000135119 | 84900     | RNFT2         |
| ENSG00000131979 | 2643      | GCH1          |
| ENSG00000156218 | 57188     | ADAMTSL3      |
| ENSG00000183044 | 18        | ABAT          |
| ENSG00000184857 | 25880     | TMEM186       |
| ENSG00000140650 | 5373      | PMM2          |

|                 |        |          |
|-----------------|--------|----------|
| ENSG00000153048 | 23589  | CARHSP1  |
| ENSG00000141252 | 55275  | VPS53    |
| ENSG00000188803 | 388336 | SHISA6   |
| ENSG00000088756 | 79822  | ARHGAP28 |
| ENSG00000101489 | 56853  | CELF4    |
| ENSG00000197046 | 284266 | SIGLEC15 |
| ENSG00000152223 | 57724  | EPG5     |
| ENSG00000129437 | 43847  | KLK14    |

14

15

**Table S3.** List of the 96 genes assigned by FUMA from UKB GWAS

|                 |           |                |
|-----------------|-----------|----------------|
| ENSG00000142599 | 473       | RERE           |
| ENSG00000074800 | 2023      | ENO1           |
| ENSG00000198162 | 10905     | MAN1A2         |
| ENSG00000092607 | 6913      | TBX15          |
| ENSG00000198756 | 23127     | COLGALT2       |
| ENSG00000068024 | 9759      | HDAC4          |
| ENSG00000023330 | 211       | ALAS1          |
| ENSG00000239732 | 54106     | TLR9           |
| ENSG00000173366 | 54106     | TLR9           |
| ENSG00000247596 | 11344     | TWF2           |
| ENSG00000164088 | 132160    | PPM1M          |
| ENSG00000164091 | 80335     | WDR82          |
| ENSG00000168237 | 132158    | GLYCK          |
| ENSG00000114841 | 25981     | DNAH1          |
| ENSG00000163930 | 8314      | BAP1           |
| ENSG00000010318 | 51533     | PHF7           |
| ENSG00000010319 | 56920     | SEMA3G         |
| ENSG00000114854 | 7134      | TNNC1          |
| ENSG00000010322 | 11188     | NISCH          |
| ENSG00000010327 | 23166     | STAB1          |
| ENSG00000168268 | 64943     | NT5DC2         |
| ENSG00000168273 | 440957    | SMIM4          |
| ENSG00000163939 | 55193     | PBRM1          |
| ENSG00000163938 | 26354     | GNL3           |
| ENSG00000016864 | 55830     | GLT8D1         |
| ENSG00000114902 | 28972     | SPCS1          |
| ENSG00000114904 | 6787      | NEK4           |
| ENSG00000055957 | 3697      | ITIH1          |
| ENSG00000162267 | 3699      | ITIH3          |
| ENSG00000055955 | 3700      | ITIH4          |
| ENSG00000243696 | NA        | RP5-966M1.6    |
| ENSG00000272573 | 389125    | MUSTN1         |
| ENSG00000248592 | 100526772 | TMEM110-MUSTN1 |
| ENSG00000213533 | 375346    | TMEM110        |
| ENSG00000163935 | 51460     | SFMBT1         |

|                 |        |               |
|-----------------|--------|---------------|
| ENSG00000272305 | NA     | RP11-894J14.5 |
| ENSG00000163933 | 91869  | RFT1          |
| ENSG00000163378 | 285203 | EOGT          |
| ENSG00000144747 | 7110   | TMF1          |
| ENSG00000163380 | 56203  | LMOD3         |
| ENSG00000114541 | 23150  | FRMD4B        |
| ENSG00000181804 | 285195 | SLC9A9        |
| ENSG00000186038 | 285242 | HTR3E         |
| ENSG00000145191 | 8893   | EIF2B5        |
| ENSG00000163995 | 84448  | ABLIM2        |
| ENSG00000163110 | 10611  | PDLIM5        |
| ENSG00000171604 | 51523  | CXXC5         |
| ENSG00000070614 | 3340   | NDST1         |
| ENSG00000171992 | 11346  | SYNPO         |
| ENSG00000154269 | 5169   | ENPP3         |
| ENSG00000127946 | 3092   | HIP1          |
| ENSG00000155158 | 158219 | TTC39B        |
| ENSG00000148219 | 23245  | ASTN2         |
| ENSG00000119401 | 22954  | TRIM32        |
| ENSG00000136944 | 4010   | LMX1B         |
| ENSG00000099204 | 3983   | ABLIM1        |
| ENSG00000175029 | 1488   | CTBP2         |
| ENSG00000173727 | NA     | AP000769.1    |
| ENSG00000142186 | 57410  | SCYL1         |
| ENSG00000168056 | 4054   | LTBP3         |
| ENSG00000173465 | 10534  | SSSCA1        |
| ENSG00000176973 | 23625  | FAM89B        |
| ENSG00000173442 | 254102 | EHBP1L1       |
| ENSG00000137494 | 338699 | ANKRD42       |
| ENSG00000137500 | 60492  | CCDC90B       |
| ENSG00000150672 | 1740   | DLG2          |
| ENSG00000054654 | 23224  | SYNE2         |
| ENSG00000140009 | 2100   | ESR2          |
| ENSG00000100714 | 4522   | MTHFD1        |
| ENSG00000119599 | 26094  | DCAF4         |
| ENSG00000165861 | 53349  | ZFYVE1        |
| ENSG00000119707 | 58517  | RBM25         |
| ENSG00000080815 | 5663   | PSEN1         |

---

|                 |           |               |
|-----------------|-----------|---------------|
| ENSG00000159314 | 201176    | ARHGAP27      |
| ENSG00000225190 | 9842      | PLEKHM1       |
| ENSG00000120088 | 1394      | CRHR1         |
| ENSG00000185294 | 162540    | SPPL2C        |
| ENSG00000186868 | 4137      | MAPT          |
| ENSG00000256762 | 246744    | STH           |
| ENSG00000120071 | 284058    | KANSL1        |
| ENSG00000228696 | 100506084 | ARL17B        |
| ENSG00000176681 | 9884      | LRRC37A       |
| ENSG00000238083 | 474170    | LRRC37A2      |
| ENSG00000185829 | 51326     | ARL17A        |
| ENSG00000073969 | 4905      | NSF           |
| ENSG00000108379 | 7473      | WNT3          |
| ENSG00000154217 | 26207     | PITPNC1       |
| ENSG00000184828 | 201501    | ZBTB7C        |
| ENSG00000160469 | 84446     | BRSK1         |
| ENSG00000180061 | 284417    | TMEM150B      |
| ENSG00000267706 | NA        | CTD-2105E13.6 |
| ENSG00000180043 | 284418    | FAM71E2       |
| ENSG00000095752 | 3589      | IL11          |
| ENSG00000160472 | 147744    | TMEM190       |
| ENSG00000198185 | 55713     | ZNF334        |
| ENSG00000149635 | 128506    | OCSTAMP       |
| ENSG00000182463 | 128553    | TSHZ2         |

**Table S4.** Demographics of UK biobank samples used in this study

|             | DDH (n=3,315)        | control (n=74,038)     |
|-------------|----------------------|------------------------|
| Gender (%)  | 1987 Females (59.9%) | 37,804 Females (51.1%) |
| Age (years) | 61.9 (S.D ±6.0 )     | 54.7 (S.D ±7.8 )       |
